# Supplementary material
Source: publisher site journal article supplement (https://www.spandidos-publications.com/684/downloadSupplementary)
Supplement: Supplementary file 1 [file downloadSupplementary]

## Sheet: query2map
KEGG pathway analysis ACBP-treated MKN-45 cells protein functions query2map.
Protein_ID	KO	Name	Definition	Map_ID	Map_Name	URL
Q9UDW1	K00419	QCR9, UCRC	ubiquinol-cytochrome c reductase subunit 9	map00190	Oxidative phosphorylation	http://www.kegg.jp/kegg-bin/show_pathway?map00190+K00419
Q9UDW1	K00419	QCR9, UCRC	ubiquinol-cytochrome c reductase subunit 9	map04260	Cardiac muscle contraction	http://www.kegg.jp/kegg-bin/show_pathway?map04260+K00419
Q9UDW1	K00419	QCR9, UCRC	ubiquinol-cytochrome c reductase subunit 9	map04932	Non-alcoholic fatty liver disease (NAFLD)	http://www.kegg.jp/kegg-bin/show_pathway?map04932+K00419
Q9UDW1	K00419	QCR9, UCRC	ubiquinol-cytochrome c reductase subunit 9	map05010	Alzheimer's disease	http://www.kegg.jp/kegg-bin/show_pathway?map05010+K00419
Q9UDW1	K00419	QCR9, UCRC	ubiquinol-cytochrome c reductase subunit 9	map05012	Parkinson's disease	http://www.kegg.jp/kegg-bin/show_pathway?map05012+K00419
Q9UDW1	K00419	QCR9, UCRC	ubiquinol-cytochrome c reductase subunit 9	map05016	Huntington's disease	http://www.kegg.jp/kegg-bin/show_pathway?map05016+K00419
B4DXI2	K11723	BRD7_9	bromodomain-containing protein 7/9
Q9BYH2	K13869	SLC7A11	solute carrier family 7 (L-type amino acid transporter), member 11
Q96AE4	K13210	FUBP	far upstream element-binding protein
B4DUP5
G3V1D1	K00522	FTH1	ferritin heavy chain [EC:1.16.3.2;]	map04978	Mineral absorption	http://www.kegg.jp/kegg-bin/show_pathway?map04978+K00522
Q4G148	K13676	GXYLT	UDP-xylose:glucoside alpha-1,3-xylosyltransferase [EC:2.4.2.-]	map00514	Other types of O-glycan biosynthesis	http://www.kegg.jp/kegg-bin/show_pathway?map00514+K13676
Q16678	K07410	CYP1B1	cytochrome P450 family 1 subfamily B polypeptide 1 [EC:1.14.14.1;]	map00140	Steroid hormone biosynthesis	http://www.kegg.jp/kegg-bin/show_pathway?map00140+K07410
Q16678	K07410	CYP1B1	cytochrome P450 family 1 subfamily B polypeptide 1 [EC:1.14.14.1;]	map00380	Tryptophan metabolism	http://www.kegg.jp/kegg-bin/show_pathway?map00380+K07410
Q16678	K07410	CYP1B1	cytochrome P450 family 1 subfamily B polypeptide 1 [EC:1.14.14.1;]	map00980	Metabolism of xenobiotics by cytochrome P450	http://www.kegg.jp/kegg-bin/show_pathway?map00980+K07410
Q16678	K07410	CYP1B1	cytochrome P450 family 1 subfamily B polypeptide 1 [EC:1.14.14.1;]	map04913	Ovarian steroidogenesis	http://www.kegg.jp/kegg-bin/show_pathway?map04913+K07410
Q16678	K07410	CYP1B1	cytochrome P450 family 1 subfamily B polypeptide 1 [EC:1.14.14.1;]	map05204	Chemical carcinogenesis	http://www.kegg.jp/kegg-bin/show_pathway?map05204+K07410
Q16678	K07410	CYP1B1	cytochrome P450 family 1 subfamily B polypeptide 1 [EC:1.14.14.1;]	map05206	MicroRNAs in cancer	http://www.kegg.jp/kegg-bin/show_pathway?map05206+K07410
M0R2S3
B7ZL14	K20121	FNBP1	formin-binding protein 1
Q5JSB5	K04683	TFDP1	transcription factor Dp-1	map04110	Cell cycle	http://www.kegg.jp/kegg-bin/show_pathway?map04110+K04683
Q5JSB5	K04683	TFDP1	transcription factor Dp-1	map04350	TGF-beta signaling pathway	http://www.kegg.jp/kegg-bin/show_pathway?map04350+K04683
B4DWS8	K17630	RASA4, CAPRI	Ras GTPase-activating protein 4	map04014	Ras signaling pathway	http://www.kegg.jp/kegg-bin/show_pathway?map04014+K17630
A0A0J9YX89
A0A1B0GVI7	K09093	AHR	aryl hydrocarbon receptor	map04659	Th17 cell differentiation	http://www.kegg.jp/kegg-bin/show_pathway?map04659+K09093
Q05BX6	K12480	RABEP1	Rab GTPase-binding effector protein 1	map04144	Endocytosis	http://www.kegg.jp/kegg-bin/show_pathway?map04144+K12480
Q53EY9	K10302	FBXO22	F-box protein 22
K7ER90

## Sheet: map2query
KEGG pathway analysis ACBP-treated MKN-45 cells protein functions map2query.
Map_ID	Map_Name	Seqs	Seqs_Num	URL
map00380	Tryptophan metabolism	Q16678	1	http://www.kegg.jp/kegg-bin/show_pathway?map00380+K07410
map04144	Endocytosis	Q05BX6	1	http://www.kegg.jp/kegg-bin/show_pathway?map04144+K12480
map05012	Parkinson's disease	Q9UDW1	1	http://www.kegg.jp/kegg-bin/show_pathway?map05012+K00419
map05010	Alzheimer's disease	Q9UDW1	1	http://www.kegg.jp/kegg-bin/show_pathway?map05010+K00419
map00980	Metabolism of xenobiotics by cytochrome P450	Q16678	1	http://www.kegg.jp/kegg-bin/show_pathway?map00980+K07410
map00190	Oxidative phosphorylation	Q9UDW1	1	http://www.kegg.jp/kegg-bin/show_pathway?map00190+K00419
map04110	Cell cycle	Q5JSB5	1	http://www.kegg.jp/kegg-bin/show_pathway?map04110+K04683
map04350	TGF-beta signaling pathway	Q5JSB5	1	http://www.kegg.jp/kegg-bin/show_pathway?map04350+K04683
map05206	MicroRNAs in cancer	Q16678	1	http://www.kegg.jp/kegg-bin/show_pathway?map05206+K07410
map04014	Ras signaling pathway	B4DWS8	1	http://www.kegg.jp/kegg-bin/show_pathway?map04014+K17630
map00140	Steroid hormone biosynthesis	Q16678	1	http://www.kegg.jp/kegg-bin/show_pathway?map00140+K07410
map04932	Non-alcoholic fatty liver disease (NAFLD)	Q9UDW1	1	http://www.kegg.jp/kegg-bin/show_pathway?map04932+K00419
map04659	Th17 cell differentiation	A0A1B0GVI7	1	http://www.kegg.jp/kegg-bin/show_pathway?map04659+K09093
map05016	Huntington's disease	Q9UDW1	1	http://www.kegg.jp/kegg-bin/show_pathway?map05016+K00419
map04260	Cardiac muscle contraction	Q9UDW1	1	http://www.kegg.jp/kegg-bin/show_pathway?map04260+K00419
map00514	Other types of O-glycan biosynthesis	Q4G148	1	http://www.kegg.jp/kegg-bin/show_pathway?map00514+K13676
map04913	Ovarian steroidogenesis	Q16678	1	http://www.kegg.jp/kegg-bin/show_pathway?map04913+K07410
map04978	Mineral absorption	G3V1D1	1	http://www.kegg.jp/kegg-bin/show_pathway?map04978+K00522
map05204	Chemical carcinogenesis	Q16678	1	http://www.kegg.jp/kegg-bin/show_pathway?map05204+K07410

## Sheet: TopMapStat
KEGG pathway analysis ACBP-treated MKN-45 cells protein functions TopMapStat.
Map_ID	Map_Name	Seqs	Seqs_Num	URL
map00380	Tryptophan metabolism	Q16678	1	http://www.kegg.jp/kegg-bin/show_pathway?map00380+K07410
map04144	Endocytosis	Q05BX6	1	http://www.kegg.jp/kegg-bin/show_pathway?map04144+K12480
map05012	Parkinson's disease	Q9UDW1	1	http://www.kegg.jp/kegg-bin/show_pathway?map05012+K00419
map05010	Alzheimer's disease	Q9UDW1	1	http://www.kegg.jp/kegg-bin/show_pathway?map05010+K00419
map00980	Metabolism of xenobiotics by cytochrome P450	Q16678	1	http://www.kegg.jp/kegg-bin/show_pathway?map00980+K07410
map00190	Oxidative phosphorylation	Q9UDW1	1	http://www.kegg.jp/kegg-bin/show_pathway?map00190+K00419
map04110	Cell cycle	Q5JSB5	1	http://www.kegg.jp/kegg-bin/show_pathway?map04110+K04683
map04350	TGF-beta signaling pathway	Q5JSB5	1	http://www.kegg.jp/kegg-bin/show_pathway?map04350+K04683
map05206	MicroRNAs in cancer	Q16678	1	http://www.kegg.jp/kegg-bin/show_pathway?map05206+K07410
map04014	Ras signaling pathway	B4DWS8	1	http://www.kegg.jp/kegg-bin/show_pathway?map04014+K17630
map00140	Steroid hormone biosynthesis	Q16678	1	http://www.kegg.jp/kegg-bin/show_pathway?map00140+K07410
map04932	Non-alcoholic fatty liver disease (NAFLD)	Q9UDW1	1	http://www.kegg.jp/kegg-bin/show_pathway?map04932+K00419
map04659	Th17 cell differentiation	A0A1B0GVI7	1	http://www.kegg.jp/kegg-bin/show_pathway?map04659+K09093
map05016	Huntington's disease	Q9UDW1	1	http://www.kegg.jp/kegg-bin/show_pathway?map05016+K00419
map04260	Cardiac muscle contraction	Q9UDW1	1	http://www.kegg.jp/kegg-bin/show_pathway?map04260+K00419
map00514	Other types of O-glycan biosynthesis	Q4G148	1	http://www.kegg.jp/kegg-bin/show_pathway?map00514+K13676
map04913	Ovarian steroidogenesis	Q16678	1	http://www.kegg.jp/kegg-bin/show_pathway?map04913+K07410
map04978	Mineral absorption	G3V1D1	1	http://www.kegg.jp/kegg-bin/show_pathway?map04978+K00522
map05204	Chemical carcinogenesis	Q16678	1	http://www.kegg.jp/kegg-bin/show_pathway?map05204+K07410

## Sheet: Enrichment
KEGG pathway analysis ACBP-treated MKN-45 cells protein functions Enrichment.
Map_ID	Map_Name	Test	TestAll	Ref	RefAll	Test_per	Ref_per	Test_Seq	Ref_Seq	Over_Under	P value	FDR	richFactor
map00514	Other types of O-glycan biosynthesis	1	17	8	6210	5.88235	0.128824	Q4G148	Q8NBJ5 Q9H488 F5H225 B4DLB8 O60568 Q4G148 O15294 Q59GJ5	over	0.0217036	0.145512	0.125
map00140	Steroid hormone biosynthesis	1	17	11	6210	5.88235	0.177134	Q16678	B4DK69 Q53GQ0 Q16678 P21964 P19224 A0A0A0MSS8 P37059 Q9NRW5 P17516 E7EMT5 P08842	over	0.0297275	0.145512	0.0909091
map04913	Ovarian steroidogenesis	1	17	12	6210	5.88235	0.193237	Q16678	Q16678 B0AZR9 P17612 A0A0A0MSS8 P37059 P22694 Q9NRW5 Q9UH51 E7EMT5 B7ZKQ9 A8K2S1 O43306	over	0.0323884	0.145512	0.0833333
map04978	Mineral absorption	1	17	14	6210	5.88235	0.225443	G3V1D1	G3V1D1 O00244 B2R7U4 P05023 P30519 P05026 P02795 P04732 P54709 O15431 B3KW93 Q13733 Q9Y6M5 B5MC02	over	0.0376895	0.145512	0.0714286
map00380	Tryptophan metabolism	1	17	19	6210	5.88235	0.305958	Q16678	P05091 P30084 P04040 P24752 P40939 Q16836 A0A1B0GTG2 Q16678 P51648 P30837 A0A0D9SFS3 Q9BWD1 Q08426 A0A0A0MRN7 P49189 P21397 B7Z242 E7EMT5 Q92947	over	0.050823	0.145512	0.0526316
map04350	TGF-beta signaling pathway	1	17	21	6210	5.88235	0.338164	Q5JSB5	P67775 B4DDF7 E5RJR5 B4DHN0 P61586 P30154 Q5JSB5 A0A0C4DGX4 B4DDM0 C8C069 Q9UBS0 Q53SF4 Q59F45 A0A0U1RQV4 C4PGM0 P07996 P62877 H7C0I7 A0A024RAL3 Q16254 Q09472	over	0.056029	0.145512	0.047619
map00980	Metabolism of xenobiotics by cytochrome P450	1	17	22	6210	5.88235	0.354267	Q16678	P16152 P09211 P21266 B2R983 P47895 P30838 Q2NLC8 P11766 Q16678 H3BLU7 P10620 O75828 P19224 O14880 P09488 P07099 P46439 Q16772 Q96SQ9 E7EMT5 Q99735 A8K987	over	0.0586219	0.145512	0.0454545
map05204	Chemical carcinogenesis	1	17	24	6210	5.88235	0.386473	Q16678	P16152 P09211 P21266 B2R983 P47895 P30838 Q2NLC8 P11766 Q16678 P10620 P19224 A0A0A0MRN7 O14880 P0DMM9 P09488 A0A1B0GUR5 P07099 P46439 Q16772 E7EMT5 Q99735 A8K987 A6NGV6 Q6U7I7	over	0.0637876	0.145512	0.0416667
map04659	Th17 cell differentiation	1	17	26	6210	5.88235	0.41868	A0A1B0GVI7	P08238 P07900 B4DHN0 B5BTZ6 I3L1A4 Q2TAM5 N1NSB5 B5BTY5 P42224 B4E0K5 D3DWY0 C9JWM1 A0A0S2Z3Y4 A0A1B0GVI7 Q06310 Q59F45 P19838 B5BUB8 P42345 Q9BQD2 Q5F2F8 B3KRB7 Q59GT1 P19174 Q4LDX3 K7EK35	over	0.0689266	0.145512	0.0384615
map04260	Cardiac muscle contraction	1	17	31	6210	5.88235	0.499195	Q9UDW1	P14854 P67936 O14949 P14927 Q9UDW1 P22695 P13073 A8K3K1 P31930 P05023 P10606 Q567R0 P06753 P05026 D6R9Z7 P47985 P14406 P09669 P54709 E5E079 H9T3W9 A0A097Q0T5 E5DZN4 P20674 B3KW93 P24311 Q8TBT6 Q13733 B2RAH2 A0A1B0GW58 A0A059RS35	over	0.0816583	0.155151	0.0322581
map05206	MicroRNAs in cancer	1	17	65	6210	5.88235	1.0467	Q16678	H3BPC4 P36952 B2R6J2 B4DUQ1 B5BU83 Q2MJK0 B3KR50 H0YD13 P61586 P35241 Q9NZI8 Q16678 A0A024RAV5 F5H2U8 Q9UH60 P08581 B5BTZ6 G3V5A9 P46109 B4DFY5 P46108 Q00534 Q96FF9 H6TXS1 P36507 P29966 H7BYN4 P01111 P26358 A8K132 H6WA46 I3L4X2 P42574 E7BSV0 B2RAF9 P19838 A0A0U1RQV4 P42345 P04626 B3KRK7 B4DKX4 O43521 Q5T8Z6 Q96EB6 Q9P119 P07996 Q07820 A8K724 B2R728 B4DL02 Q59GZ8 B3KRB7 Q96RG4 Q658X7 P05771 Q8N122…	over	0.163985	0.256484	0.0153846
map04014	Ras signaling pathway	1	17	69	6210	5.88235	1.11111	B4DWS8	P51148 Q9UBI6 P20339 B2RDW0 Q13177 B3KR50 P62834 P61020 P62330 P60953 B4DHN0 Q13153 P63000 P61586 P62879 B2R6K4 P11234 A0A024RAV5 P11233 P08581 E9PK85 P17612 B4DFY5 P63218 Q2TAM5 P36507 A0A0S2Z3D2 P01111 P29317 P22694 Q06124 D3DWY0 P10301 E7BSV0 B4DN44 Q13043 P31749 Q9UHD2 B4DWS8 P31751 P19838 B5BUB8 A8MQ02 H0Y6T3 B4E1P2 B4DDN9 A8K724 B3KPN7 B4DL02 B3KRB7 H0Y465 B4DTL8 Q59GT1 Q59E87 Q9NQU5 P05771…	over	0.1732	0.256484	0.0144928
map04110	Cell cycle	1	17	70	6210	5.88235	1.12721	Q5JSB5	P62258 P63104 P12004 P27348 A0A024QZP7 Q04917 P31946 P31947 P61981 B2R7C5 E5RJR5 Q2MJK0 B2RBA6 A0A024RB10 A0A140VJF3 Q4ZG57 P49736 P33992 A0A024R7U6 B0AZQ4 Q14683 Q9UH60 B5BU61 P78527 B2R841 Q13257 Q00534 P49841 O60216 B3KMP2 Q5JSB5 A0A0C4DGX4 Q8N3U4 B3KUJ5 Q5T8C6 Q6AI02 P14635 A8K7H4 Q9Y6D9 Q8NHZ8 B4E014 B4DTN0 B4DHK6 Q9UDM8 O75419 Q12834 Q59F45 Q9UJX2 H3BT22 J3KN87 B4DYU9 B4DL80 Q9UJX6 Q9H1A4 H…	over	0.175489	0.256484	0.0142857
map04932	Non-alcoholic fatty liver disease (NAFLD)	1	17	88	6210	5.88235	1.41707	Q9UDW1	P14854 C9JFR7 O14949 P14927 P05198 Q9UDW1 O95167 O43678 P22695 O00483 P13073 P31930 A0A087WZX2 P60953 O75489 P10606 P63000 Q567R0 P31040 F8WAS3 H3BPJ9 Q07812 O75380 O75438 D6R9Z7 P17568 Q9UI09 P21912 O95298 O95168 Q9BTT5 P28331 O43920 B4DEZ3 P47985 P14406 R4GN43 O75306 F8VYY9 B1PL87 Q13131 P51970 Q2TAM5 Q9UEH5 B7Z7N1 B6CGU5 P49841 P09669 G3V0I5 O43181 Q9NX14 E9PKH6 O14561 Q53SW4 E5E079 H9T3W9 A0A…	over	0.215682	0.281582	0.0113636
map05012	Parkinson's disease	1	17	97	6210	5.88235	1.562	Q9UDW1	P68036 A0A059S4M9 O75947 P14854 C9JFR7 P21796 O14949 P14927 P18859 Q9UDW1 Q99497 O95167 O43678 A0A096WXL7 Q9Y277 P22695 P45880 O00483 P06576 P13073 P05141 P25705 P12236 P31930 A8K787 A0A087WZX2 P22314 O75489 P48047 P10606 Q567R0 P31040 Q5QNZ2 B4DL14 F8WAS3 H3BPJ9 O75380 O75438 D6R9Z7 P17568 Q9UI09 P21912 O95298 O95168 Q9BTT5 P56381 P28331 O43920 B4DEZ3 P47985 P14406 B2R6X6 R4GN43 O75306 Q14WI3 P1…	over	0.235079	0.281582	0.0103093
map00190	Oxidative phosphorylation	1	17	98	6210	5.88235	1.5781	Q9UDW1	A0A059S4M9 O75947 P14854 Q15181 P56385 Q14061 O14949 P14927 P18859 Q9UDW1 O95167 O43678 A0A096WXL7 P22695 O00483 P06576 P13073 P25705 P31930 P38606 E9PN17 A0A087WZX2 Q16864 O75489 P48047 P10606 Q567R0 P21283 P31040 Q5QNZ2 B4DL14 F8WAS3 H3BPJ9 P36543 P21281 O75380 O75438 D6R9Z7 P17568 Q9UI09 P21912 O75348 O95298 O95168 Q9BTT5 Q9H2U2 P56381 P28331 O43920 B4DEZ3 P47985 P14406 R4GN43 O75306 Q14WI3 P5…	over	0.237207	0.281582	0.0102041
map05010	Alzheimer's disease	1	17	105	6210	5.88235	1.69082	Q9UDW1	Q99714 A0A059S4M9 O75947 P14854 C9JFR7 P04406 Q2TSD0 O14949 P14927 P18859 Q9UDW1 O95167 O43678 B2RDW0 A0A096WXL7 P22695 O00483 P06576 P13073 P25705 P31930 Q6IPN0 A0A087WZX2 B4DHN0 O75489 P48047 P10606 Q567R0 P31040 Q5QNZ2 B4DL14 F8WAS3 H3BPJ9 A6XGP7 O75380 O75438 D6R9Z7 P17568 Q9UI09 P21912 P16615 O95298 O95168 A0A024R5A3 Q9BTT5 P56381 P28331 O43920 O14672 P14735 B4DEZ3 P47985 P14406 R4GN43 O7530…	over	0.251942	0.281582	0.00952381
map05016	Huntington's disease	1	17	121	6210	5.88235	1.94847	Q9UDW1	A0A059S4M9 O75947 P14854 C9JFR7 P21796 O14949 P14927 P00441 P18859 Q9UDW1 O95167 O43678 A0A096WXL7 Q9Y277 P22695 P45880 O00483 P06576 Q00610 P13073 P05141 P25705 P12236 P31930 A8K787 A0A087WZX2 C9JLU1 O75489 P48047 P10606 Q13561 Q567R0 P31040 Q5QNZ2 B4DL14 F8WAS3 A0A087WVZ9 H3BPJ9 A0A087WY71 Q07812 O75380 O75438 A0A0C4DFU1 D6R9Z7 P17568 H0UID5 Q9UI09 P21912 O95298 O95168 Q9BTT5 P62875 P56381 P283…	over	0.284623	0.300435	0.00826446
map04144	Endocytosis	1	17	145	6210	5.88235	2.33494	Q05BX6	P51149 P61026 Q15907 P51148 P11142 B1AK87 O15511 P20339 P47755 P0DMV9 Q4W4Y1 P02786 P61204 Q00610 P33176 P61006 P61020 P62330 P60953 A0A0S4XQV4 Q9UK41 P61586 Q9BY43 P52907 O15144 Q3SYF1 A0A087WY71 Q9H444 Q9BPX5 Q03135 Q9UBQ0 Q59GU6 B3KML1 P59998 A8K885 H0UID5 A8K4G7 F5H157 A8K5S3 P08581 B2R4D5 P51636 P50570 Q9UN37 Q9UQD4 Q96QK1 Q9NR46 P34931 O60493 Q8TF74 O95782 P54652 P09496 O75436 P53680 Q9BRG1…	over	0.331135	0.331135	0.00689655
